# Supplementary material
Source: Springer Nature journal article supplement (https://www.springermedizin.de/resource/supplementary/13054_2006_4648_MOESM2_ESM.pdf/9723442)

## Sabadell Score

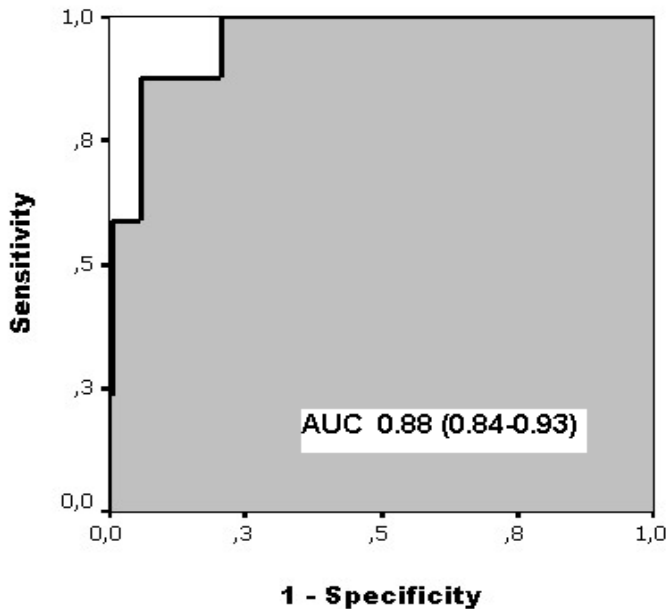

Supplement: MOESM2 [file 9723442]
